# Supplementary material for: Constrained formation of 2-(1-(arylimino)ethyl)-7-arylimino-6,6-dimethylcyclopentapyridines and their cobalt(ii) chloride complexes: synthesis, characterization and ethylene polymerization
Source: Royal Society of Chemistry journal article supplement (doi:10.1039/c5ra04722f), 2015-01-01
Supplement: c5ra04722f1.pdf [file c5ra04722f1.pdf]

## Supporting Information

for

# Constrained formation of 2-(1-(arylimino)ethyl)-7-arylimino-6,6-dimethylcyclopentapyridines and their cobalt(II) chloride complexes: synthesis, characterization and ethylene polymerization

Junjun Ba, Shizhen Du, Erlin Yue, Xinquan Hu, Zygmunt Flisak, Wen-Hua Sun

NMR spectra for 2-acetyl-cyclopentapyridin-7-one

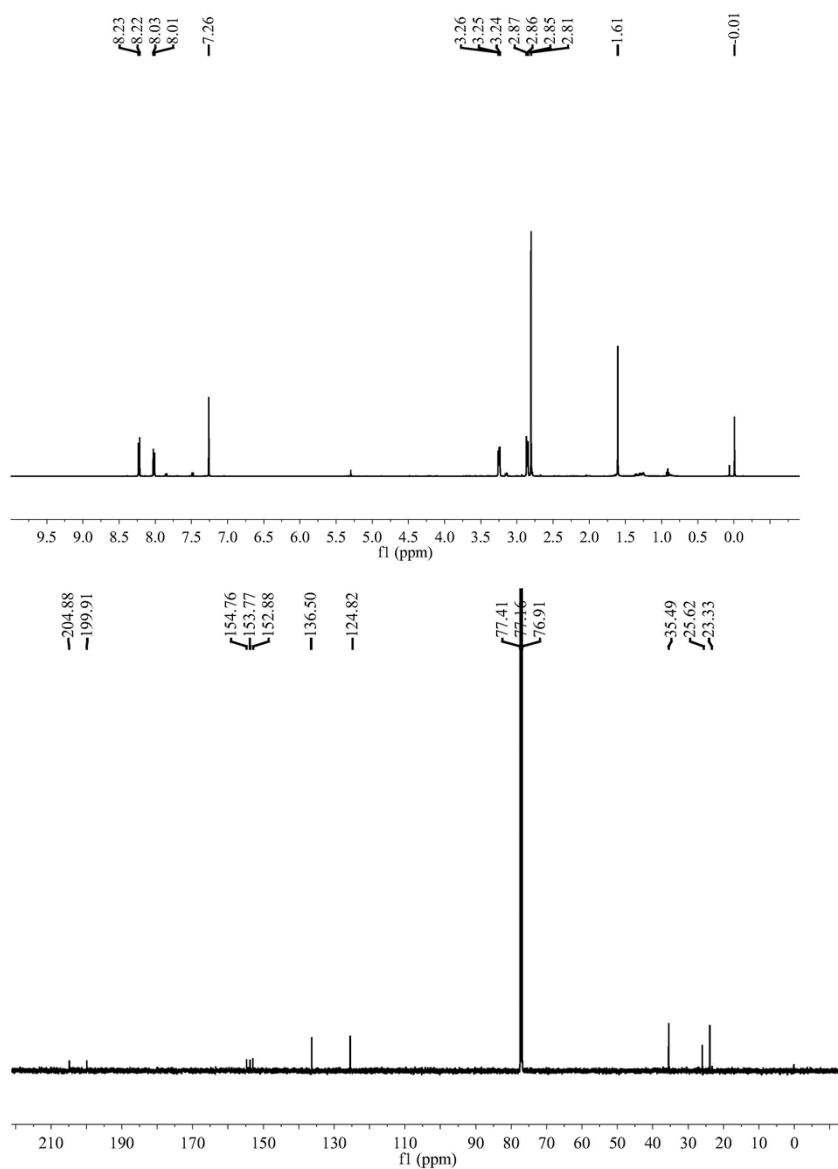

## Cartesian coordinates of selected optimized structures

|                                    |           |           |           |                                           |           |           |           |
|------------------------------------|-----------|-----------|-----------|-------------------------------------------|-----------|-----------|-----------|
| 53                                 |           |           |           | N                                         | 2.358179  | 0.441721  | 0.141764  |
| C1'.log E(UB3LYP) = -2158.28974397 |           |           |           | C                                         | -1.337739 | 1.949186  | 0.053746  |
| C                                  | -3.745869 | 2.655039  | -0.286906 | C                                         | 0.970744  | 2.355312  | 0.149007  |
| H                                  | -4.661105 | 2.111945  | -0.519041 | C                                         | 3.552418  | -0.316778 | 0.081864  |
| H                                  | -3.556404 | 3.384709  | -1.080547 | C                                         | -2.869436 | -1.435805 | -0.063286 |
| H                                  | -3.906638 | 3.214260  | 0.642163  | C                                         | -0.559635 | 4.210058  | 0.094565  |
| C                                  | -2.573528 | 1.714784  | -0.163348 | H                                         | -0.746650 | 5.280614  | 0.080396  |
| C                                  | -1.199136 | 2.306460  | -0.147587 | C                                         | -2.399237 | 0.899968  | 0.015079  |
| C                                  | -0.919091 | 3.683550  | -0.120816 | C                                         | 4.519247  | -0.096605 | -0.911708 |
| H                                  | -1.728636 | 4.403549  | -0.124164 | C                                         | -3.864615 | -1.611898 | 0.911400  |
| C                                  | 0.407408  | 4.133569  | -0.072953 | H                                         | 2.924779  | -1.560331 | 1.718054  |
| H                                  | 0.615581  | 5.199423  | -0.042397 | C                                         | 3.710070  | -1.371904 | 0.993015  |
| C                                  | 1.432752  | 3.188667  | -0.058929 | C                                         | -2.655117 | -2.429264 | -1.031810 |
| C                                  | 1.057101  | 1.849430  | -0.095786 | C                                         | -1.640240 | 3.323965  | 0.046489  |
| C                                  | 2.936896  | 3.289351  | -0.005444 | C                                         | 0.748930  | 3.739066  | 0.150624  |
| H                                  | 3.270064  | 3.880765  | 0.854853  | H                                         | 1.578075  | 4.434966  | 0.181593  |
| H                                  | 3.321802  | 3.794746  | -0.899293 | C                                         | -3.832733 | 1.390161  | 0.041826  |
| C                                  | 3.481078  | 1.805397  | 0.078773  | H                                         | -4.153899 | 1.499218  | 1.087491  |
| C                                  | 2.206166  | 0.933951  | -0.052304 | H                                         | -4.482199 | 0.632114  | -0.403196 |
| C                                  | 4.509571  | 1.559492  | -1.041408 | C                                         | 2.329228  | 1.727556  | 0.180562  |
| H                                  | 4.938838  | 0.558774  | -0.973198 | C                                         | 5.650453  | -0.909568 | -0.970490 |
| H                                  | 5.323603  | 2.288054  | -0.956356 | H                                         | 6.386511  | -0.745889 | -1.752237 |
| H                                  | 4.057714  | 1.671881  | -2.032592 | C                                         | -3.072587 | 3.798291  | -0.023926 |
| C                                  | 4.123572  | 1.547227  | 1.459189  | H                                         | -3.120291 | 4.745835  | -0.571653 |
| H                                  | 4.444893  | 0.506961  | 1.551147  | H                                         | -3.428570 | 4.013888  | 0.994429  |
| H                                  | 3.420560  | 1.757138  | 2.271924  | H                                         | -3.980854 | -0.881109 | 1.704743  |
| H                                  | 4.999845  | 2.191540  | 1.589427  | H                                         | -1.845997 | -2.299012 | -1.743634 |
| C                                  | 2.912025  | -1.360778 | 0.012433  | C                                         | 3.522881  | 2.644717  | 0.292858  |
| C                                  | 3.009341  | -2.119826 | 1.188149  | H                                         | 4.431763  | 2.077924  | 0.489564  |
| C                                  | 3.900748  | -3.190098 | 1.242660  | H                                         | 3.371719  | 3.360482  | 1.107631  |
| H                                  | 3.980845  | -3.767383 | 2.159284  | H                                         | 3.671383  | 3.220612  | -0.627930 |
| C                                  | 4.667483  | -3.536572 | 0.127198  | C                                         | -4.474375 | -3.726684 | -0.094046 |
| H                                  | 5.349926  | -4.379959 | 0.173084  | H                                         | -5.095950 | -4.617156 | -0.105596 |
| C                                  | 4.530138  | -2.808158 | -1.055148 | H                                         | 4.358030  | 0.674133  | -1.658633 |
| H                                  | 5.098011  | -3.087466 | -1.938061 | C                                         | -4.656658 | -2.759035 | 0.895468  |
| C                                  | 3.655717  | -1.722525 | -1.119679 | H                                         | -5.411847 | -2.898201 | 1.663607  |
| H                                  | 2.367307  | -1.873934 | 2.027209  | C                                         | 4.857871  | -2.159098 | 0.938996  |
| H                                  | 3.516416  | -1.177683 | -2.047195 | H                                         | 4.981905  | -2.967046 | 1.653986  |
| C                                  | -3.842948 | -0.309036 | -0.032486 | C                                         | 5.830648  | -1.933106 | -0.038549 |
| C                                  | -3.993531 | -1.404967 | -0.896122 | H                                         | 6.714166  | -2.562835 | -0.085716 |
| C                                  | -5.152416 | -2.174905 | -0.831774 | C                                         | -3.980895 | 2.744788  | -0.667922 |
| H                                  | -5.270534 | -3.014557 | -1.510053 | H                                         | -5.024619 | 3.070851  | -0.624686 |
| C                                  | -6.144416 | -1.889180 | 0.110082  | H                                         | -3.723162 | 2.635309  | -1.728351 |
| H                                  | -7.037219 | -2.504760 | 0.166198  | C                                         | -3.472624 | -3.556344 | -1.053605 |
| C                                  | -5.972785 | -0.824037 | 0.995987  | H                                         | -3.311267 | -4.315543 | -1.813151 |
| H                                  | -6.725098 | -0.613703 | 1.750473  |                                           |           |           |           |
| C                                  | -4.829440 | -0.029147 | 0.926278  | 50                                        |           |           |           |
| H                                  | -3.197231 | -1.636876 | -1.597191 | ligand-C1'.log E(RB3LYP) = -1092.67819785 |           |           |           |
| H                                  | -4.677233 | 0.774672  | 1.639331  | C                                         | -4.007856 | 2.001158  | -0.645536 |
| Cl                                 | -0.523176 | -1.684970 | -2.058754 | H                                         | -4.892895 | 1.427171  | -0.920426 |
| Cl                                 | -0.529161 | -1.344318 | 2.119789  | H                                         | -3.688206 | 2.597988  | -1.505565 |
| Co                                 | -0.618267 | -0.616388 | -0.042503 | H                                         | -4.297318 | 2.702048  | 0.146338  |
| N                                  | -0.193824 | 1.415995  | -0.133561 | C                                         | -2.888920 | 1.080744  | -0.192073 |
| N                                  | 1.955434  | -0.318264 | -0.041826 | C                                         | -1.512235 | 1.674387  | -0.076307 |
| N                                  | -2.633523 | 0.426860  | -0.103950 | C                                         | -1.339514 | 3.071003  | 0.022690  |
|                                    |           |           |           | H                                         | -2.198627 | 3.731452  | 0.006051  |
| 50                                 |           |           |           | C                                         | -0.060951 | 3.609130  | 0.156756  |
| C0.log E(UB3LYP) = -2118.98517408  |           |           |           | H                                         | 0.081318  | 4.682919  | 0.245984  |
| Co                                 | 0.284902  | -0.533126 | 0.011796  | C                                         | 1.013726  | 2.726767  | 0.172627  |
| Cl                                 | 0.615560  | -1.305764 | -2.119667 | C                                         | 0.739955  | 1.357982  | 0.051694  |
| Cl                                 | 0.262938  | -1.559532 | 2.058832  | C                                         | 2.488780  | 2.973684  | 0.327245  |
| N                                  | -0.070738 | 1.513587  | 0.096892  | H                                         | 2.713297  | 3.280277  | 1.357374  |
| N                                  | -1.998790 | -0.320488 | -0.066077 | H                                         | 2.852801  | 3.777378  | -0.323032 |

|   |           |           |           |
|---|-----------|-----------|-----------|
| C | 3.178612  | 1.606023  | -0.000619 |
| C | 2.011536  | 0.580761  | 0.056969  |
| C | 3.733137  | 1.645992  | -1.443493 |
| H | 4.186888  | 0.690632  | -1.715770 |
| H | 4.499920  | 2.424531  | -1.526842 |
| H | 2.943149  | 1.870186  | -2.168112 |
| C | 4.314193  | 1.317058  | 0.993611  |
| H | 4.843684  | 0.394286  | 0.751596  |
| H | 3.935586  | 1.231611  | 2.017349  |
| H | 5.038645  | 2.139452  | 0.971157  |
| C | 3.117161  | -1.542351 | 0.067453  |
| C | 3.581113  | -2.115971 | 1.264419  |
| C | 4.618451  | -3.045355 | 1.242719  |
| H | 4.972059  | -3.468552 | 2.178943  |
| C | 5.196840  | -3.441007 | 0.034223  |
| H | 6.000721  | -4.170407 | 0.022376  |
| C | 4.717232  | -2.897976 | -1.158309 |
| H | 5.145376  | -3.206580 | -2.108111 |
| C | 3.683832  | -1.961324 | -1.148954 |
| H | 3.118537  | -1.822724 | 2.201453  |
| H | 3.292430  | -1.562107 | -2.079233 |
| C | -4.232593 | -0.851460 | 0.063076  |
| C | -4.343272 | -1.993795 | -0.749313 |
| C | -5.514073 | -2.746219 | -0.748145 |
| H | -5.589890 | -3.616845 | -1.393574 |
| C | -6.579634 | -2.401638 | 0.088556  |
| H | -7.485000 | -3.000837 | 0.098032  |
| C | -6.462300 | -1.289696 | 0.922729  |
| H | -7.277318 | -1.019838 | 1.588702  |
| C | -5.303253 | -0.513490 | 0.909205  |
| H | -3.500389 | -2.269600 | -1.374648 |
| H | -5.207581 | 0.341248  | 1.571919  |
| N | -0.474213 | 0.823307  | -0.063810 |
| N | 2.001711  | -0.691632 | 0.084274  |
| N | -3.011355 | -0.163122 | 0.078208  |

47

ligand-C0.log E(RB3LYP) = -1053.36708367

|   |           |           |           |
|---|-----------|-----------|-----------|
| N | -0.125960 | 1.052817  | -0.018726 |
| N | 2.007561  | -0.623556 | 0.167336  |
| N | -2.603597 | -0.045609 | -0.181948 |
| C | 1.105261  | 1.575472  | -0.053054 |
| C | -1.189595 | 1.860902  | 0.013264  |
| C | -3.785824 | -0.796516 | -0.127158 |
| C | 2.977212  | -1.634026 | 0.112175  |
| C | 0.227416  | 3.803840  | -0.015863 |
| H | 0.361238  | 4.882887  | -0.006967 |
| C | 2.254837  | 0.607311  | -0.079477 |
| C | -4.481321 | -1.002023 | 1.077491  |
| C | 3.685501  | -1.940948 | -1.063387 |
| H | -3.666689 | -1.324059 | -2.207362 |
| C | -4.224015 | -1.460313 | -1.286118 |
| C | 3.163753  | -2.444517 | 1.246254  |
| C | 1.345666  | 2.969249  | -0.065221 |
| C | -1.049268 | 3.260203  | 0.027178  |
| H | -1.912862 | 3.913105  | 0.068019  |
| C | 3.625937  | 1.204279  | -0.358714 |
| H | 3.737098  | 1.358493  | -1.442165 |
| H | 4.401482  | 0.494302  | -0.062325 |
| C | -2.547446 | 1.212588  | 0.039007  |
| C | -5.598823 | -1.835932 | 1.111404  |
| H | -6.120673 | -1.989520 | 2.052016  |
| C | 2.742395  | 3.545997  | -0.130857 |
| H | 2.784467  | 4.477545  | 0.445470  |
| H | 2.962147  | 3.824098  | -1.172791 |
| H | 3.512665  | -1.348953 | -1.956925 |

|   |           |           |           |
|---|-----------|-----------|-----------|
| H | 2.589138  | -2.225784 | 2.140557  |
| C | -3.743098 | 2.113454  | 0.287353  |
| H | -4.668594 | 1.539338  | 0.302334  |
| H | -3.820833 | 2.869913  | -0.501820 |
| H | -3.647644 | 2.647838  | 1.238862  |
| C | 4.778698  | -3.795184 | 0.048074  |
| H | 5.473018  | -4.629533 | 0.023797  |
| H | -4.122415 | -0.524160 | 1.984030  |
| C | 4.571860  | -3.017366 | -1.091596 |
| H | 5.103987  | -3.246223 | -2.010903 |
| C | -5.353572 | -2.273060 | -1.245951 |
| H | -5.687137 | -2.767786 | -2.153947 |
| C | -6.047393 | -2.468327 | -0.048539 |
| H | -6.919481 | -3.114331 | -0.019043 |
| C | 3.799832  | 2.552512  | 0.353487  |
| H | 4.804499  | 2.948113  | 0.170920  |
| H | 3.705117  | 2.408759  | 1.437038  |
| C | 4.070538  | -3.499857 | 1.216561  |
| H | 4.214133  | -4.106030 | 2.106680  |

3

CoCl2-quartet.log E(UB3LYP) = -1065.51898368

|    |           |           |          |
|----|-----------|-----------|----------|
| Cl | 2.115372  | -0.023452 | 0.000000 |
| Cl | -2.115372 | 0.021845  | 0.000000 |
| Co | 0.000000  | 0.001011  | 0.000000 |
